# Supplementary material for: Beyond megadrought and collapse in the Northern Levant: The chronology of Tell Tayinat and two historical inflection episodes, around 4.2ka BP, and following 3.2ka BP
Source: PubMed Central journal article supplement (PMC7595433; doi:10.1371/journal.pone.0240799), 2020-10-29
Supplement: pone.0240799.s003.pdf [file pone.0240799.s003.pdf]

Results for the selected elements of Model 2 as listed in Table 4 comparing the outcomes from a different model run (some results vary by typically around 1 year) with the Charcoal Plus Outlier model (as in the main text and Table 4) versus the same model run alternatively with the Charcoal Outlier model [135]. The Charcoal Plus Outlier version has just three elements with OxCal Agreement values <60 (e.g., typical example, OxA-30326 @56.5%, OxA-32141 @39.6%, OxA-32170 @41.4%), whereas the Charcoal Outlier version has four elements <60 (e.g., typical example, OxA-30326 @26.6%, OxA-32141 @36.1%, OxA-32170 @ 36.9%, and OxA-30315 @53.3%). The date ranges for the selected elements shown are nonetheless very similar. Whereas whole ranges are listed in Table 4, here sub-ranges are detailed where present.

|                                                            | <b>Model 2 excluding OxA-32139 with Charcoal Plus Outlier model (as Table 4)</b><br><i>A<sub>model</sub> ~81, A<sub>overall</sub> ~80-81</i> |                                     | <b>Model 2 excluding OxA-32139 with Charcoal Outlier model</b><br><i>A<sub>model</sub> ~66, A<sub>overall</sub> ~66</i> |                                     |
|------------------------------------------------------------|----------------------------------------------------------------------------------------------------------------------------------------------|-------------------------------------|-------------------------------------------------------------------------------------------------------------------------|-------------------------------------|
|                                                            | <b>68.2% hpd</b><br><b>Date BCE</b>                                                                                                          | <b>95.4% hpd</b><br><b>Date BCE</b> | <b>68.2% hpd</b><br><b>Date BCE</b>                                                                                     | <b>95.4% hpd</b><br><b>Date BCE</b> |
| <b>Phase 8b EB IVB TPQ</b>                                 | 2518-2330                                                                                                                                    | 2585-2245                           | 2514-2337                                                                                                               | 2581-2251                           |
| <b>Phase 8a, EBIVB Destruction Event</b>                   | 2334-2328 (3.9)<br>2299-2271 (25.9)<br>2258-2211 (38.3)                                                                                      | 2396-2386 (1.5)<br>2346-2202 (93.9) | 2335-2327 (5.0)<br>2299-2271 (26.2)<br>2258-2211 (37.0)                                                                 | 2397-2387 (1.6)<br>2346-2202 (93.8) |
| <b>Phase 7 Date Estimate</b>                               | 2219-2140                                                                                                                                    | 2281-2075                           | 2219-2140                                                                                                               | 2282-2075                           |
| <b>Boundary End Phase 7</b>                                | 2187-2104                                                                                                                                    | 2200-2007                           | 2187-2105                                                                                                               | 2199-2006                           |
| <b>Phase 6c, Iron I TPQ</b>                                | 1309-1159                                                                                                                                    | 1379-1100                           | 1300-1155                                                                                                               | 1367-1102                           |
| <b>Phase 6b Date Estimate</b>                              | 1122-1045                                                                                                                                    | 1175-1023                           | 1110-1039                                                                                                               | 1164-1021                           |
| <b>Phase 6a TPQ and/or Date</b>                            | 1052-1006                                                                                                                                    | 1088-992                            | 1047-1004                                                                                                               | 1081-989                            |
| <b>Phase 5b Date Estimate</b>                              | 1008-987                                                                                                                                     | 1019-969                            | 1007-984                                                                                                                | 1018-964                            |
| <b>Phase 5a Date Estimate</b>                              | 998-975                                                                                                                                      | 1006-951                            | 997-972                                                                                                                 | 1004-946                            |
| <b>Phase 4 Date estimate – No Samples</b>                  | 987-955                                                                                                                                      | 997-925                             | 986-951                                                                                                                 | 995-920                             |
| <b>Phase 3 Date estimate – No Samples</b>                  | 985-951                                                                                                                                      | 995-920                             | 983-947                                                                                                                 | 993-916                             |
| <b>Phase 2 Early Date Estimate</b>                         | 971-930                                                                                                                                      | 982-893                             | 970-926                                                                                                                 | 980-890                             |
| <b>Phase BP1, Chicago, and Phase 2 Middle A1 – No Data</b> | 954-911 (66.7)<br>883-881 (1.5)                                                                                                              | 961-866                             | 951-913 (58.0)<br>889-877 (10.2)                                                                                        | 959-864                             |
| <b>Phase 2 Middle A2 Date Estimate</b>                     | 925-898 (54.6)<br>866-854 (13.6)                                                                                                             | 933-887 (66.0)<br>878-841 (29.4)    | 923-899 (45.1)<br>868-851 (23.1)                                                                                        | 931-886 (58.1)<br>880-841 (37.3)    |
| <b>Phase 2 Middle B Date Estimate</b>                      | 900-872 (35.8)<br>863-839 (43.4)                                                                                                             | 910-827                             | 888-871 (20.1)<br>868-837 (48.1)                                                                                        | 906-827                             |
| <b>Phase 2 Late 1 Date Estimate</b>                        | 836-782                                                                                                                                      | 868-766                             | 834-784                                                                                                                 | 859-767                             |
| <b>Phase 2 Late 2 Date Estimate</b>                        | 772-753                                                                                                                                      | 793-733                             | 773-753                                                                                                                 | 794-733                             |
| <b>Boundary Transition Phase 2 to 1</b>                    | 764-743                                                                                                                                      | 771-717                             | 765-743                                                                                                                 | 771-715 (94.9)<br>677-675 (0.5)     |
| <b>Assyrian Conquest</b>                                   | 738                                                                                                                                          | 738                                 | 738                                                                                                                     | 738                                 |
| <b>Boundary End Tayinat Sequence</b>                       | 672-669                                                                                                                                      | 674-668                             | 672-669                                                                                                                 | 674-668                             |
